# Supplementary material for: The Plasmodesmata-Located β-1,3-Glucanase Enzyme PdBG4 Regulates Trichomes Growth in Arabidopsis thaliana
Source: MDPI journal article supplement (doi:10.3390/cells11182856), 2022-09-13
Supplement: s1 [file s1]

**Table S1.** Primers in this manuscript.

| Primer            | 5'-3'                       |
|-------------------|-----------------------------|
| AtPdBG4-OE-F      | ATGGCTTTCCTAGCATGGTTTC      |
| AtPdBG4-OE-R      | TTACAATATGGAAAATGTTACAAGAAT |
| AtPdBG4-RNAi-F    | GGATTGGGCTTGTGGACCTG        |
| AtPdBG4-RNAi-R    | CCTATTTCCGACCTTCTTGC        |
| AtPdBG4-GFP/RFP-F | ATGGCTTTCCTAGCATGGTTTC      |
| AtPdBG4-GFP/RFP-R | CAATATGGAAAATGTTACAAGAATC   |
| AtPdBG4-RT-F      | GTTATTCTATGGGAACTCTACAC     |
| AtPdBG4-RT-R      | TTCACATTATTCGGCTGGT         |
| AtPdBG1-qRT-F     | GTGGCTCTAGCTCCGCAG          |
| AtPdBG1-qRT-R     | CGCAGTTAGCTCGGCCTT          |
| AtPdBG2-qRT-F     | CCTTCTGAGCACGACGCA          |
| AtPdBG2-qRT-R     | CTGCAGTTCCCGGGTGTT          |
| AtPdBG3-qRT-F     | CGCTGATCCCGGGTTGTT          |
| AtPdBG3-qRT-R     | CCCAATTCGCTGCGGTTG          |
| AtPdBG4-qRT-F     | AGCTGCATTTTCCCGGGA          |
| AtPdBG4-qRT-R     | AAGTAGCTTCACCCGCGG          |
| actin-2F          | TCAGATGCCCAGAAGTCTTGTTC     |
| actin-2R          | CCGTACAGATCCTTCCTGATATCC    |

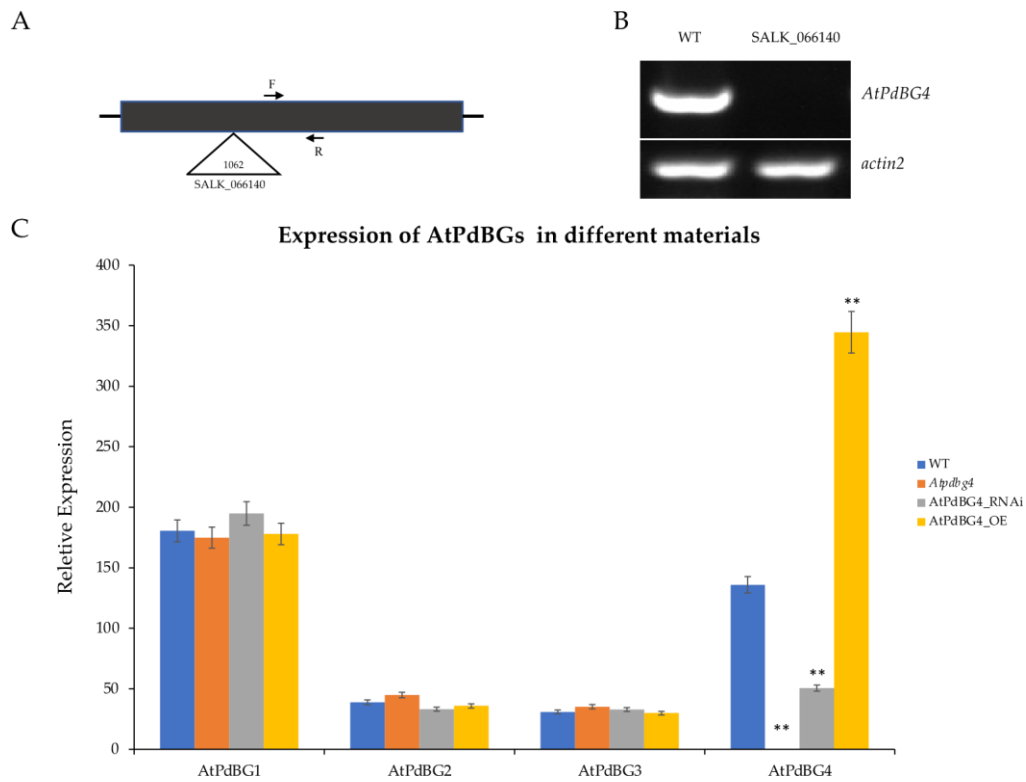

**Figure S1.** Identification of *AtPdBG4* T-DNA insertion line and quantitative detection of gene expression in transgenic and mutant materials. **(A)** Schematic model of T-DNA insertion in the mutant. The number indicates the location of the inserted coding sequence. **(B)** The upper panel shows the amplification of the coding sequence of *AtPdBG4* and no amplification in the homozygous

mutant by RT-PCR. The lower panel shows the amplification of the control gene *actin2*. (C) Quantitative real-time PCR detection of AtPdBGs for wildtype, *Atpdbg4* (SALK\_066140), *AtPdBG4* RNAi, and *AtPdBG4* OE materials. *AtPdBG4* gene mutation, RNA interference, and overexpression only affected the expression of the *AtPdBG4* gene but did not affect the expressions of *AtPdBG1*, *AtPdBG2*, and *AtPdBG3*. Student's t-test was used for statistical analysis; \*\* indicates  $p < 0.01$ .

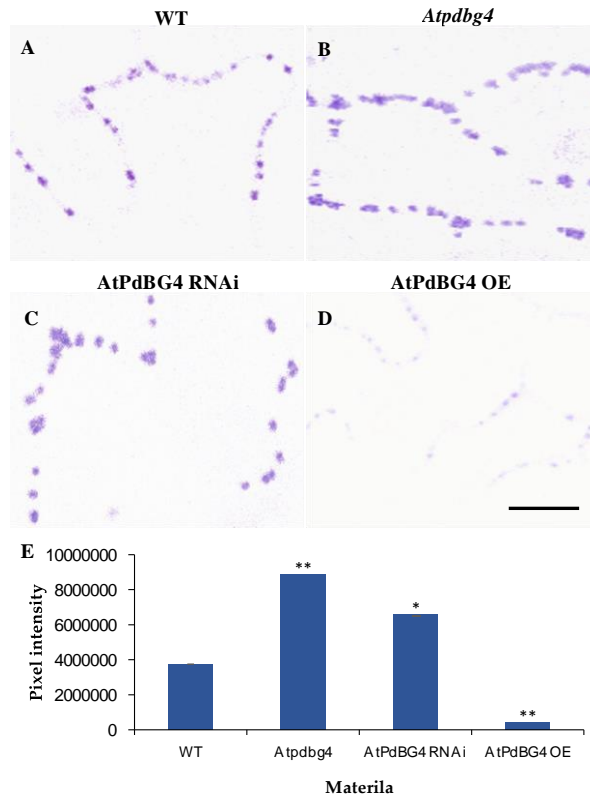

**Figure S2.** Aniline-blue-stained callose present around plasmodesmata. (A-D) Aniline blue staining of callose in leaves of Arabidopsis WT, *Atpdbg4*, *AtPdBG4* RNAi, and *AtPdBG4* OE lines, respectively. Bar = 10  $\mu$ m. (E) Aniline blue fluorescent pixel intensity. ImageJ was used to perform pixel signal intensity quantification, and the statistical analysis was performed using one-way ANOVA. Five leaf discs from three plants were analyzed for each experiment. \* indicates  $p < 0.05$ ; \*\* indicates  $p < 0.01$ .
